# Supplementary material for: Combination of Radiosensitivity Gene Signature and PD-L1 Status Predicts Clinical Outcome of Patients With Locally Advanced Head and Neck Squamous Cell Carcinoma: A Study Based on The Cancer Genome Atlas Dataset
Source: Front Mol Biosci. 2021 Dec 14;8:775562. doi: 10.3389/fmolb.2021.775562 (PMC8712874; doi:10.3389/fmolb.2021.775562)
Supplement: Supplementary file 13 [file Table8.XLSX]

## Sheet: Table S8 LASSO RESULTS COEFFICI
Gene name	Coefficients
COL9A2	0
CYP26A1	0
MYH14	0
HLF	-0.0893023
ZNF541	0
GCHFR	0
RNF165	-0.0244408
NTRK2	0
ANKRD1	0
VEGFC	0
POU4F1	-0.0523893
IL34	-0.12079
CBS	-0.0216575
PCLO	0
WNK3	0
